# Supplementary material for: Decoding the Divergent Subcellular Location of Two Highly Similar Paralogous LEA Proteins
Source: MDPI journal article supplement (doi:10.3390/ijms19061620), 2018-05-31
Supplement: s1 [file s1]

**Table S1. Transmembrane topology predictions for mature LEA38.** The sequence of mature LEA38 was submitted to six programs designed for the detection of potential transmembrane domains.

| <b>Program</b>                                                                                                                            | <b>Transmembrane domain</b> |
|-------------------------------------------------------------------------------------------------------------------------------------------|-----------------------------|
| <b>CCTOP</b> ( <a href="http://cctop.enzim.ttk.mta.hu">http://cctop.enzim.ttk.mta.hu</a> )                                                | none                        |
| <b>DAS-TMfilter</b> ( <a href="http://mendel.imp.ac.at/sat/DAS/DAS.html">http://mendel.imp.ac.at/sat/DAS/DAS.html</a> )                   | none                        |
| <b>Phobius</b> ( <a href="http://phobius.sbc.su.se/index.html">http://phobius.sbc.su.se/index.html</a> )                                  | none                        |
| <b>Predictprotein</b> ( <a href="https://www.predictprotein.org">https://www.predictprotein.org</a> )                                     | none                        |
| <b>TMHMM Server v. 2.0</b> ( <a href="http://www.cbs.dtu.dk/services/TMHMM-2.0/">http://www.cbs.dtu.dk/services/TMHMM-2.0/</a> )          | none                        |
| <b>TMpred</b> ( <a href="https://embnet.vital-it.ch/software/TMPRED_form.html">https://embnet.vital-it.ch/software/TMPRED_form.html</a> ) | none                        |
