# Supplementary material for: Decoding the Divergent Subcellular Location of Two Highly Similar Paralogous LEA Proteins
Source: MDPI journal article supplement (doi:10.3390/ijms19061620), 2018-05-31
Supplement: s1 [file s1]

## A

|              |                                                                |     |     |     |     |     |
|--------------|----------------------------------------------------------------|-----|-----|-----|-----|-----|
|              | 10                                                             | 20  | 30  | 40  | 50  | 60  |
| <b>LEA2</b>  | ATGGCTCGTTCTCTCGCTAACGCTAAGATCCAATCCGTCTTCGGCTCCGAAAAGCTCTCG   |     |     |     |     |     |
| <b>LEA38</b> | ATGGCTCGTTCTATCTCTAACGTTAAGATCGTATCTGCTTTCGTCTCTCGTGAACCTCTCC  |     |     |     |     |     |
|              | 10                                                             | 20  | 30  | 40  | 50  | 60  |
|              | 70                                                             | 80  | 90  | 100 | 110 |     |
| <b>LEA2</b>  | AACGCCGTTTTTCAGACGAGGGTTTGCCGCCGCAGC-----CAAAACGGCGTTA-----GAT |     |     |     |     |     |
| <b>LEA38</b> | AATGCTATCTTCCGACGTGGTTATGCGGCCACGGCGGCGCAAGGGAGCGTTTCGAGCGGT   |     |     |     |     |     |
|              | 70                                                             | 80  | 90  | 100 | 110 | 120 |
|              | 120                                                            | 130 | 140 | 150 | 160 |     |
| <b>LEA2</b>  | GGAAGC-----GTTTCGACCGCGGAGATGAAGAAGAGAGCTGGGGAAGCTTCAAGC       |     |     |     |     |     |
| <b>LEA38</b> | GGAAGAAGTGGAGCTGTTGCTTCGGCTGTGATGAAGAAGAAGGGAGTGGAAGAAATCAACC  |     |     |     |     |     |
|              | 130                                                            | 140 | 150 | 160 | 170 | 180 |
|              | 170                                                            | 180 | 190 | 200 | 210 | 220 |
| <b>LEA2</b>  | GAGAAGGCACCATGGGTTCCAGATCCTAAAACCGGTTATTACAGACCGGAAACCGTTTCT   |     |     |     |     |     |
| <b>LEA38</b> | CAGAAGATTTCTTGGGTTCCAGATCCCAAACCGGTTATTACAGACCGGAAACCGGTTCC    |     |     |     |     |     |
|              | 190                                                            | 200 | 210 | 220 | 230 | 240 |
|              | 230                                                            | 240 | 250 | 260 | 270 |     |
| <b>LEA2</b>  | GAGGAGATTGACCCGGCTGAGCTACGAGCTATTCTCTTGAACAACAAGCAATAA         |     |     |     |     |     |
| <b>LEA38</b> | AACGAGATTGACGCGGCTGAGCTACGAGCAGCTCTCTTGAACAACAAGCAGTGA         |     |     |     |     |     |
|              | 250                                                            | 260 | 270 | 280 | 290 |     |

## B

|                     |    |                                                    |     |
|---------------------|----|----------------------------------------------------|-----|
| <b>LEA2 intron</b>  | 1  | -----GTAACATCTG-TTTCTGAAACAAAAACGTTATGTAT          | 35  |
| <b>LEA38 intron</b> | 1  | GGTAAGTCTCTATTGT----TCTGTTTTCT-----ACTTTA-----     | 32  |
| <b>LEA2 intron</b>  | 36 | TGCTCTG---TTTTCTCGTCG-----CTTTAACAAAACGCTGAC       | 71  |
| <b>LEA38 intron</b> | 33 | TGCTCTGTTTTTTTTCTTGTAGTTATGCTCTGTTTTTTCTAAACGGTGTC | 82  |
| <b>LEA2 intron</b>  | 72 | GTTTTGGATTTTG-GATTCTCTTCAG                         | 96  |
| <b>LEA38 intron</b> | 83 | GTTTT---TTGTGTGAT-----AACA-                        | 100 |

**Supplementary data Fig. 1. Comparison of CDS (A) and intron (B) nucleotide sequences of LEA2 and LEA38 genes.** CDS alignments were performed with LALIGN Pairwise Sequence Alignment (Huang and Miller, 1991). Intron global alignments were done with EMBOSS Needle (Needleman and Wunsch, 1970). Default settings were used for both alignments. Identical nucleotides are indicated in red.
